# Supplementary material
Source: Research Square preprint supplement (doi:10.21203/rs.3.rs-8958455/v2)
Supplement: Supplementary file 1 [file 20fe328cf8443a85f3e3d817.docx]

Supporting Information

**A Material-Agnostic Self-Assembly Strategy for Uniform Patterning of Conjugated Polymers Unveils the True Role of Porosity in Organic Electrochemical Transistors**

Geon Gug Yang, Camille E. Cunnin, Rebecca F. Meacham, Sang Ouk Kim*, and Aristide Gumyusenge*

**Table of contents**

Figure S1 to S13

Table S1 to S2


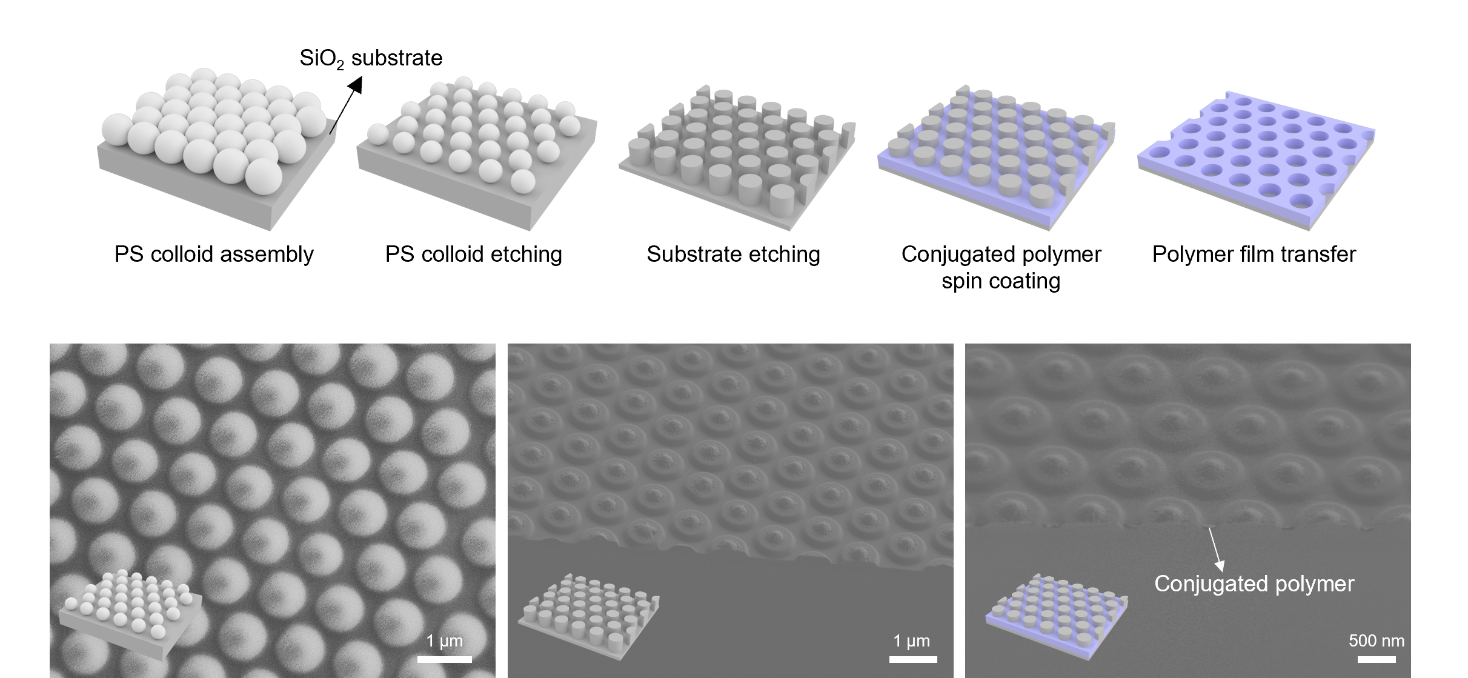


Figure S1. Schematic illustration of the preparation of a porous conjugated polymer film, with SEM images corresponding to each step.


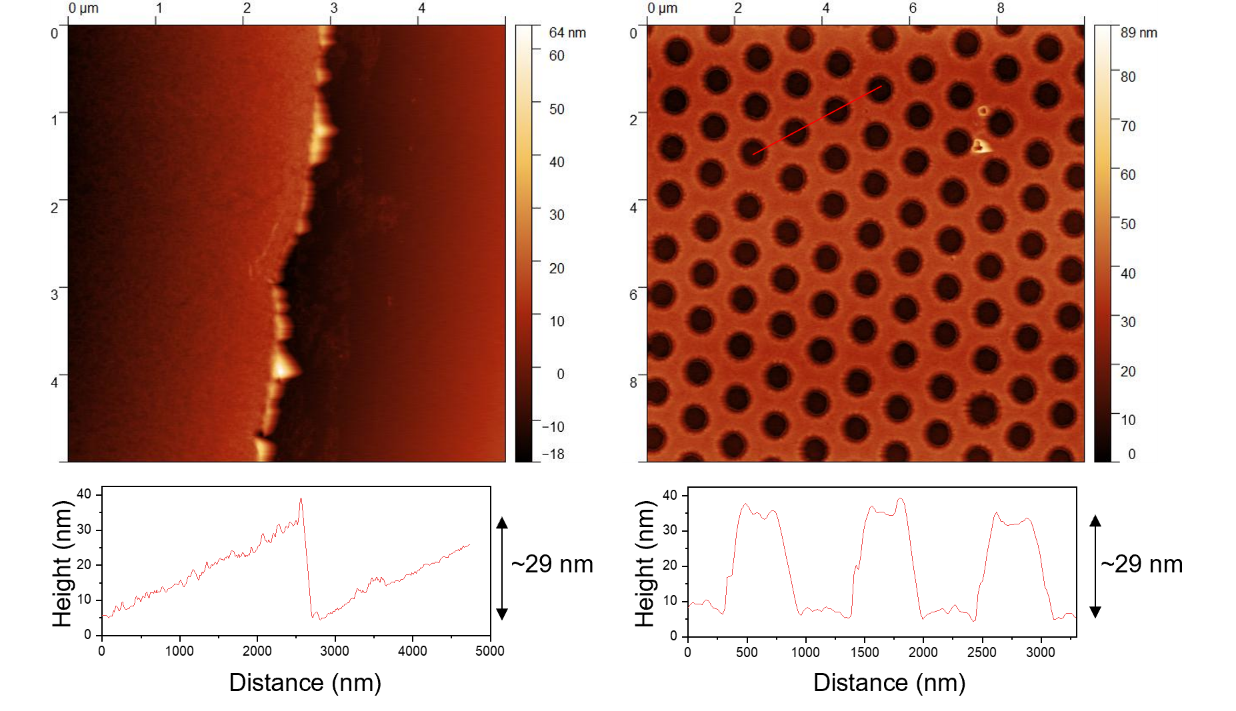


Figure S2. AFM height profiles of pristine pDPP3T and porous pDPP3T films.


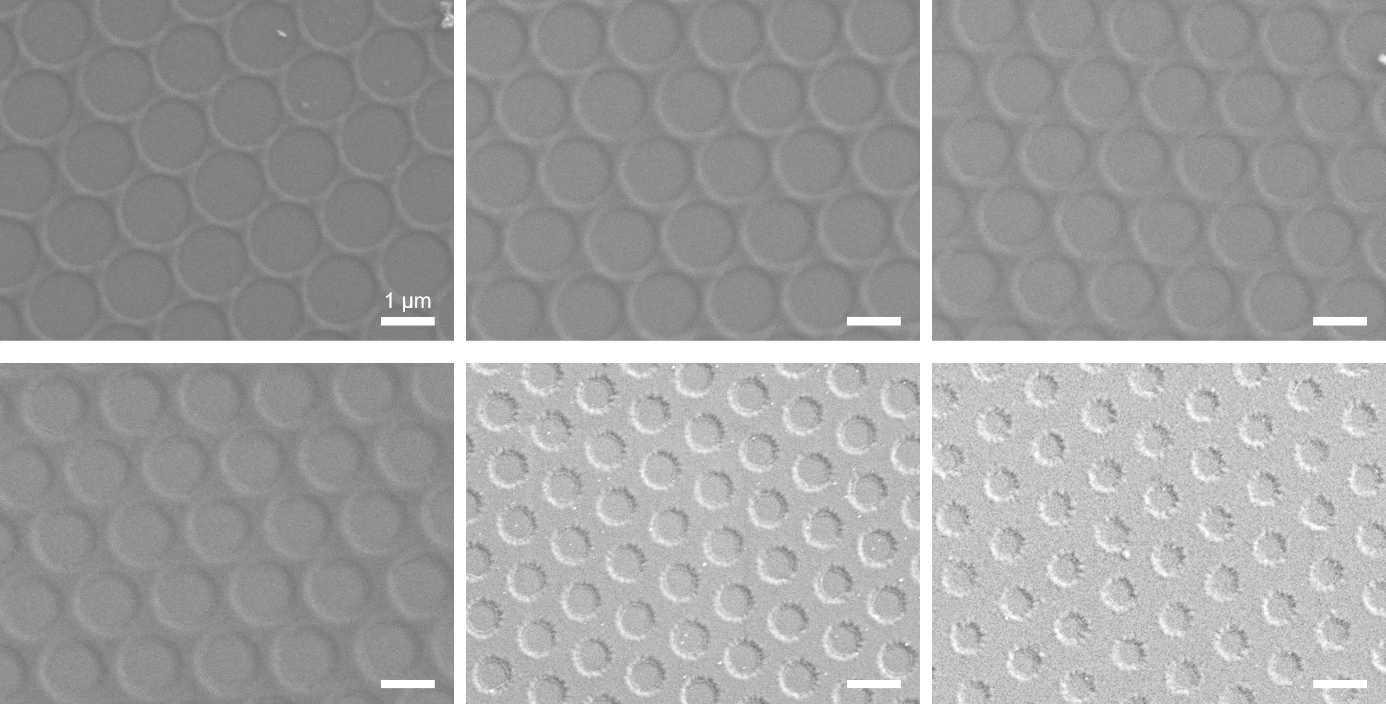


Figure S3. SEM images of pDPP3T films with diverse pore sizes.


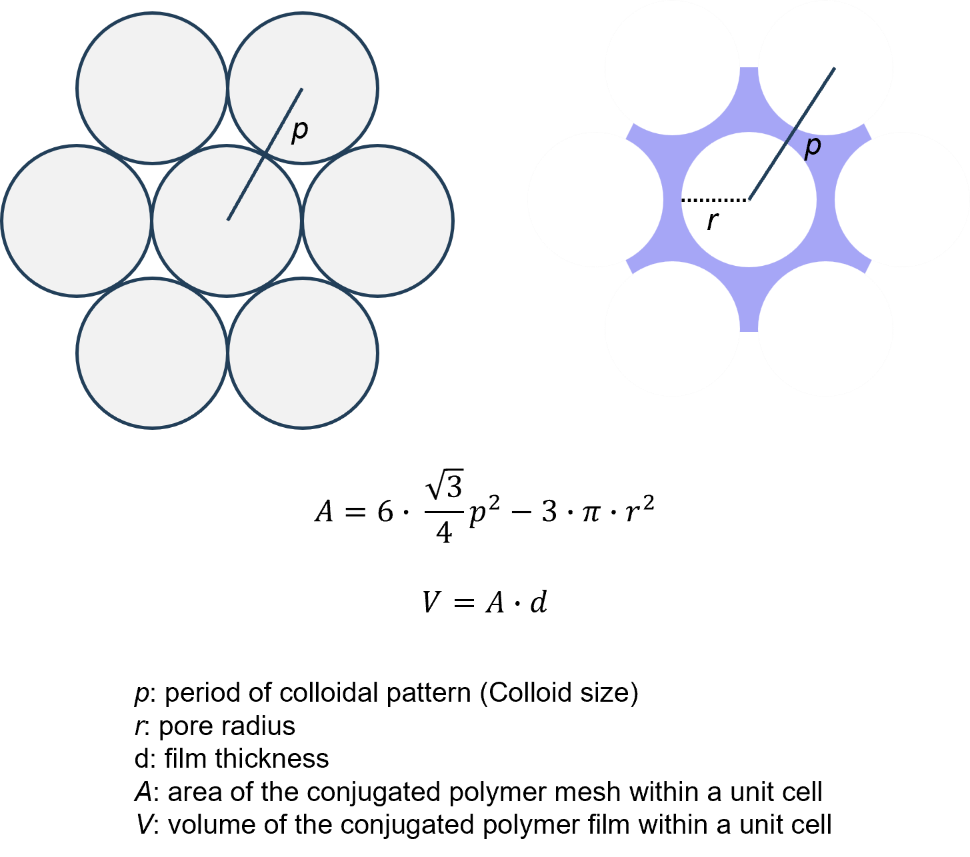


Figure S4. Calculation of the area and volume of the conjugated polymer mesh within a unit cell. In this work, *p* = 1 μm, and *r* was varied by etching time.


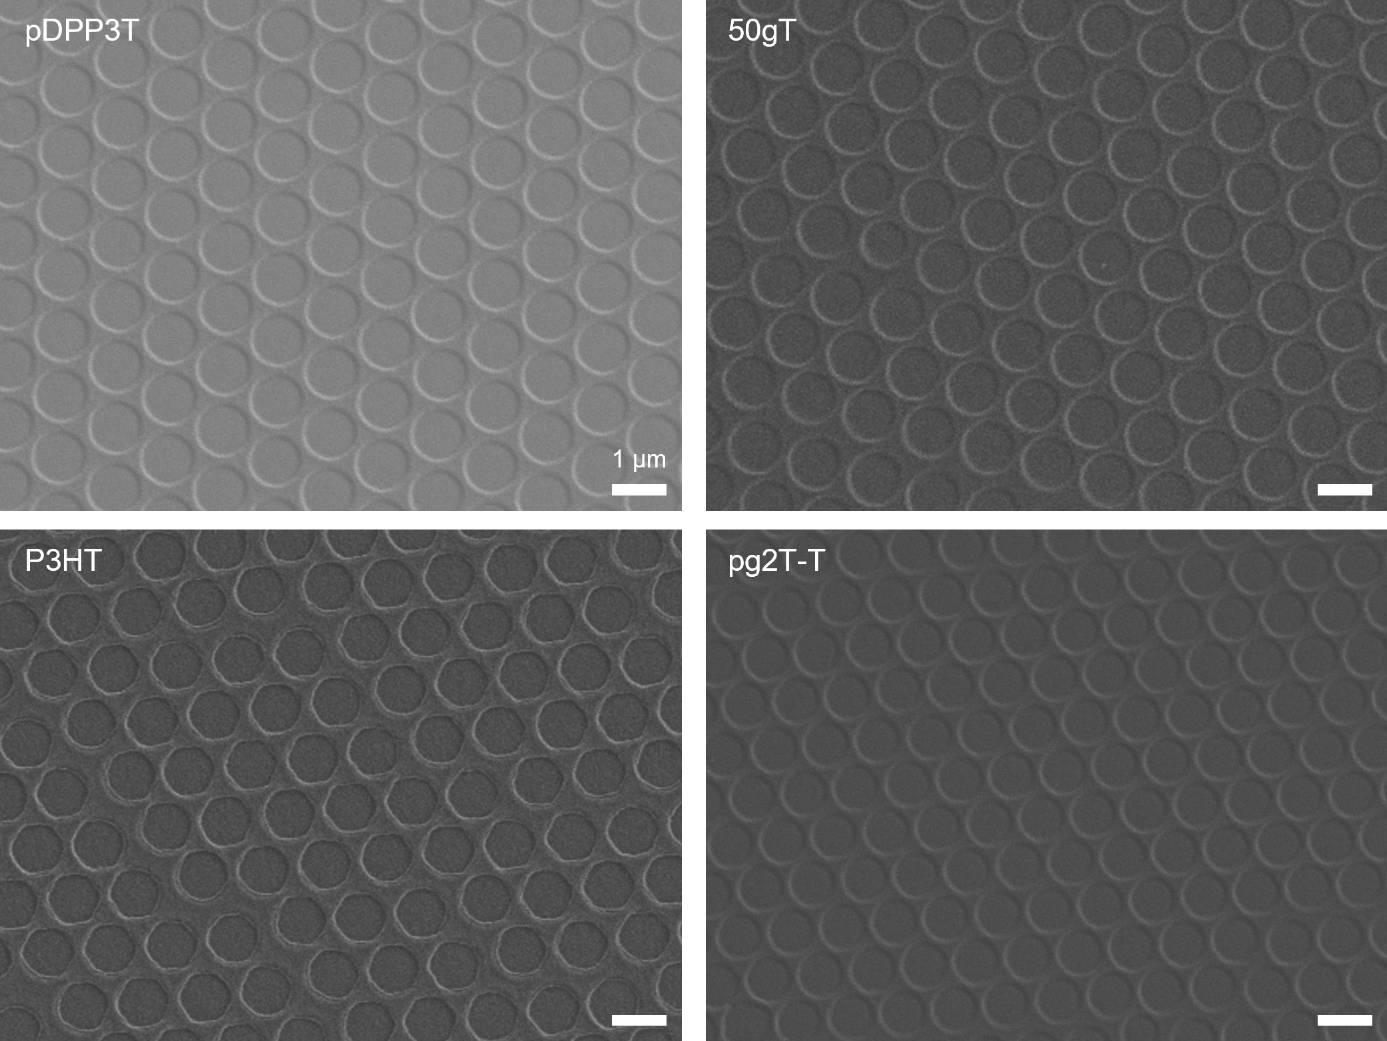


Figure S5. SEM images of porous pDPP3T, 50gT, P3HT, and pg2T-T films.


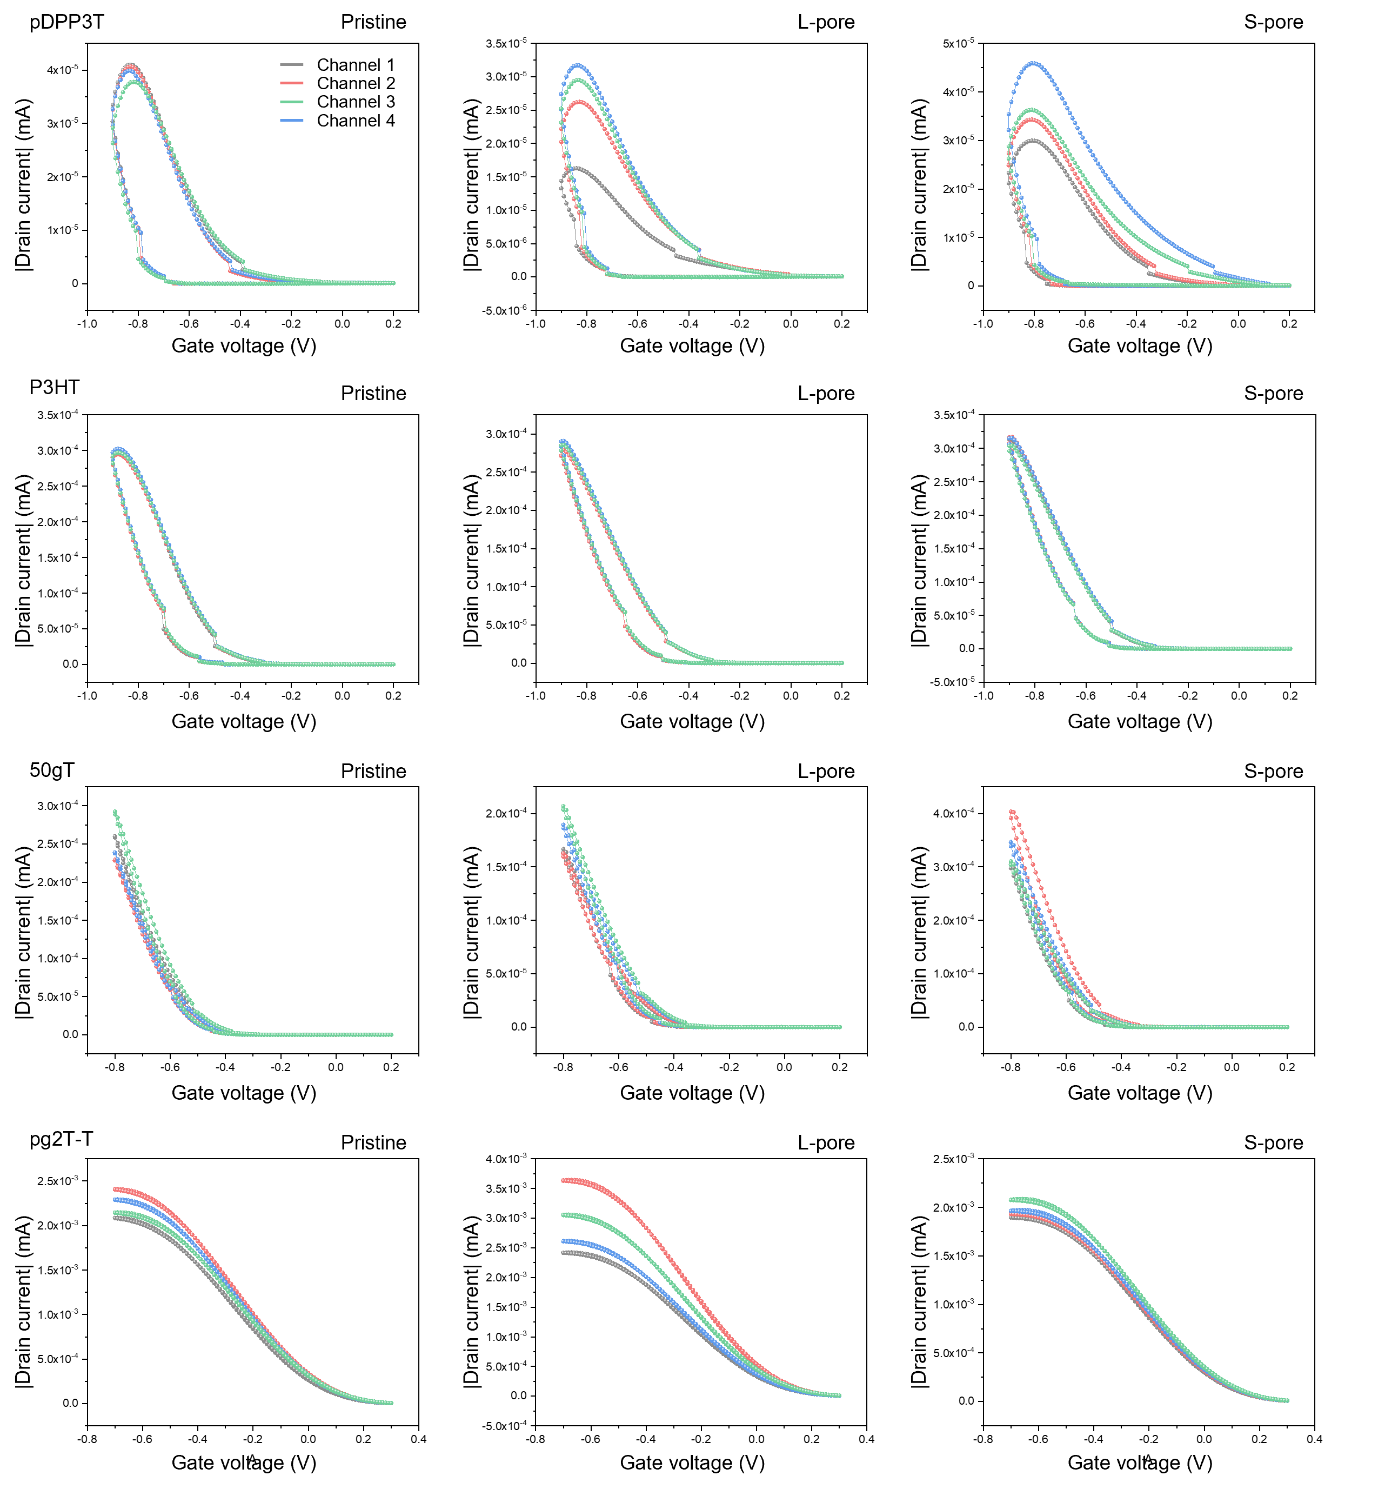


Figure S6. Representative transfer curves of pristine, L-pore, and S-pore films of pDPP3T, P3HT, 50gT, and pg2T-T.


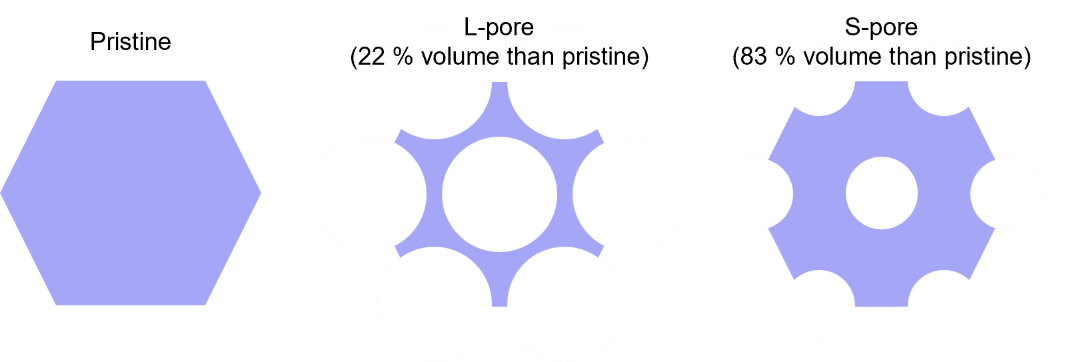


Figure S7. Calculation of the relative volume ratios of pristine, L-pore, and S-pore films for transconductance normalization.


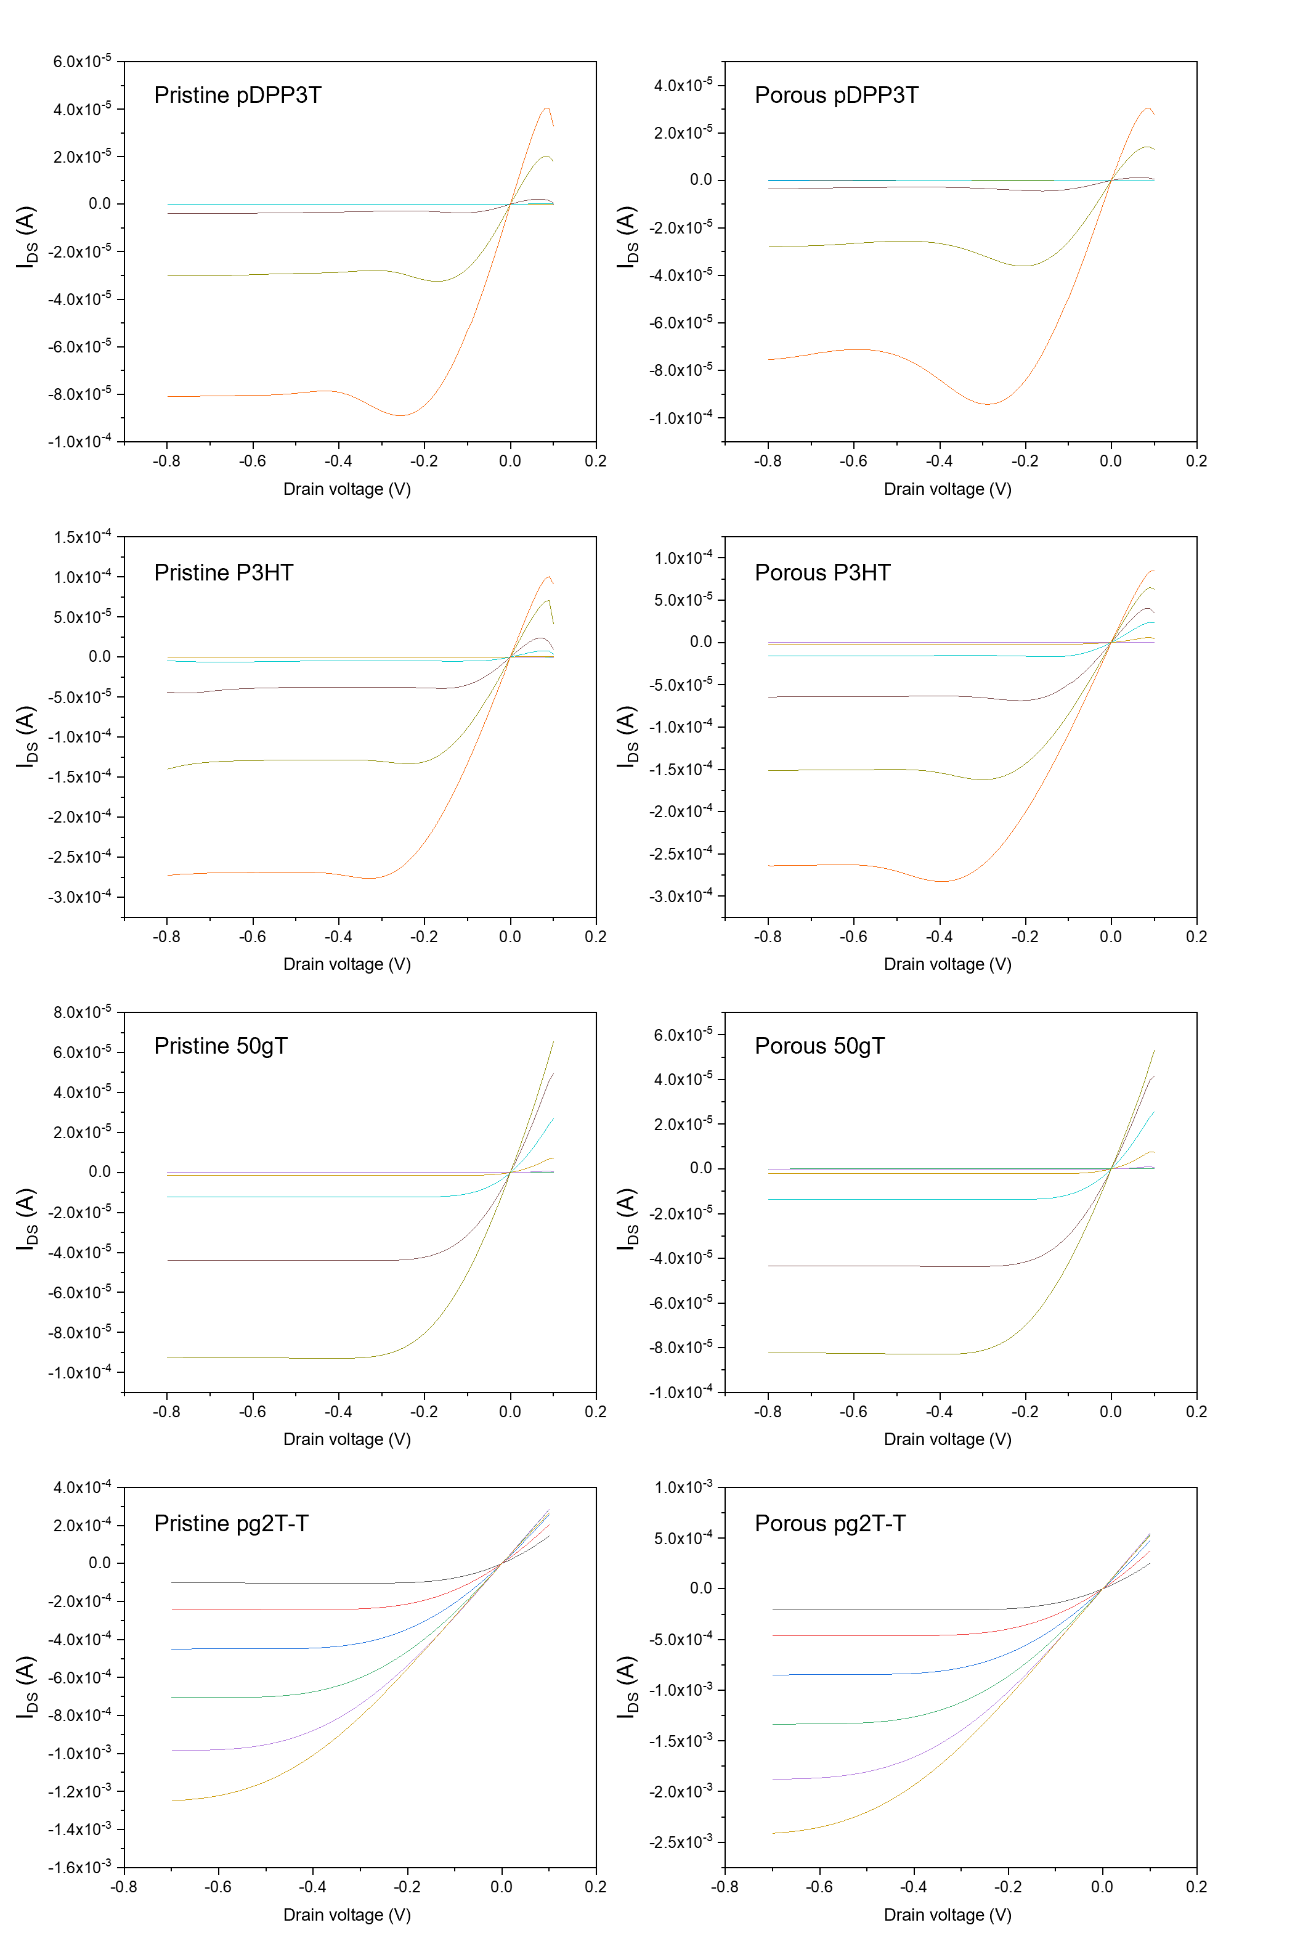


Figure S8. Representative output curves of pristine and porous pDPP3T, P3HT, 50gT, and pg2T-T films.


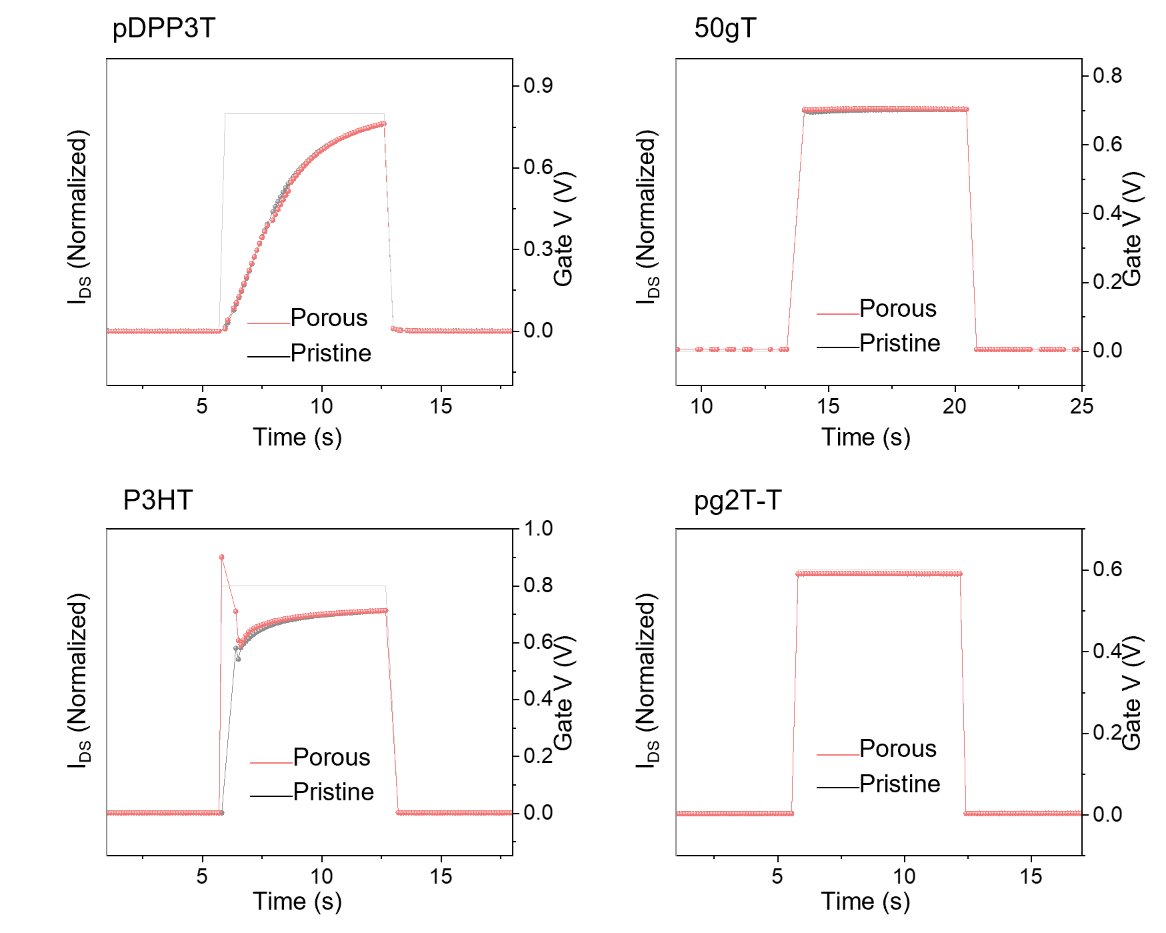


Figure S9. Response time measurement under a square-pulse gate voltage.


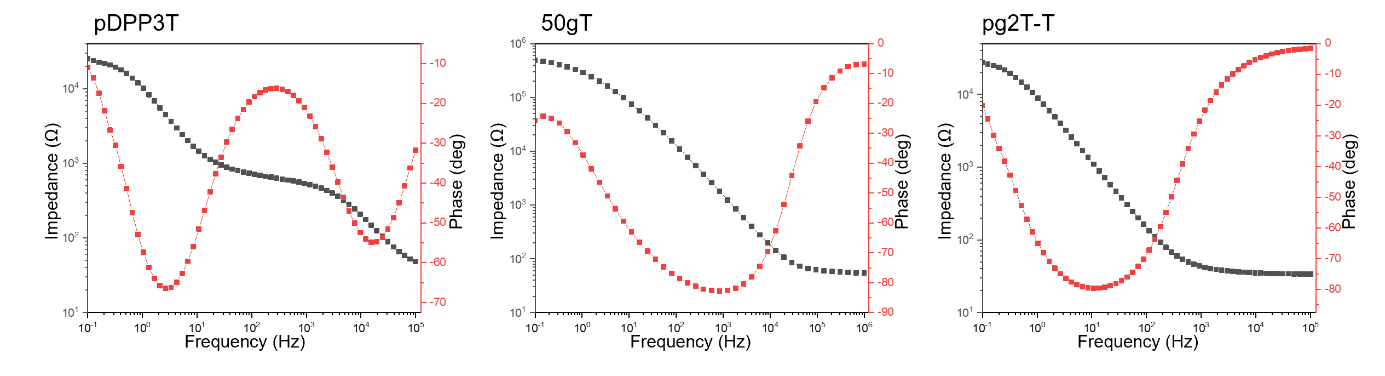


Figure S10. Bode plots of pDPP3T, 50gT, and pg2T-T.


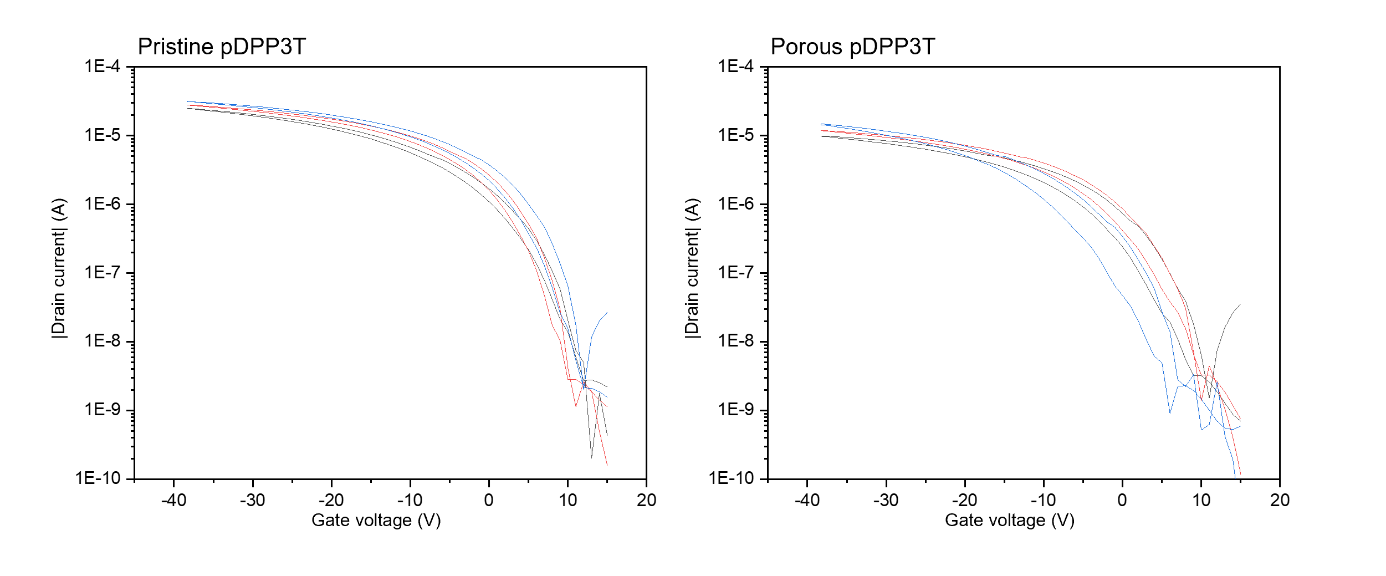


Figure S11. OFET transfer curves of pristine and porous pDPP3T.


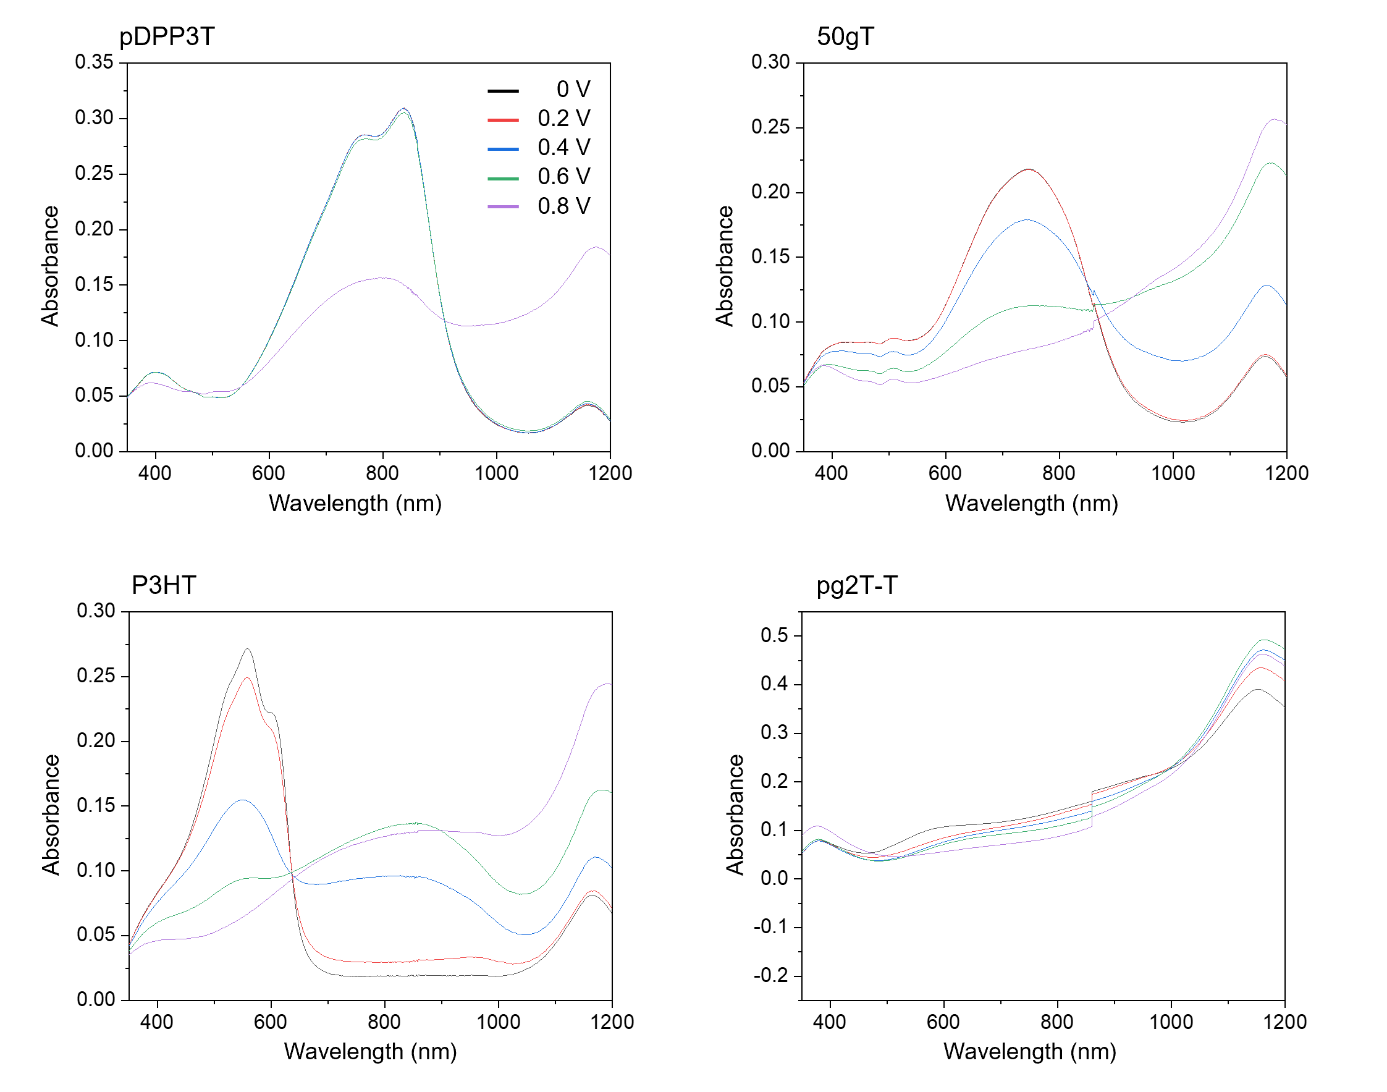


Figure S12. Spectroelectrochemical UV–vis absorbance spectra of pristine pDPP3T, 50gT, P3HT, and pg2T-T in 0.1 M KPF₆ aqueous solution.


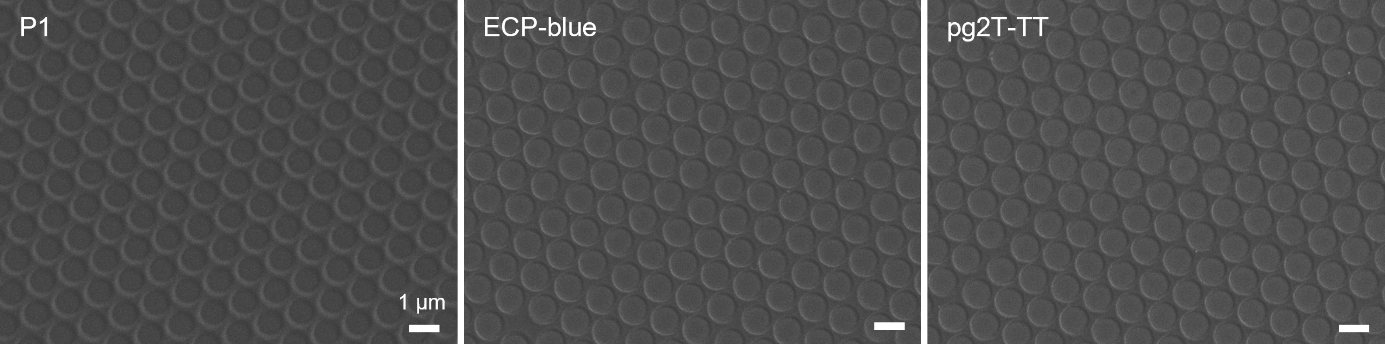


Figure S13. SEM images of porous P1, ECP-blue, and pg2T-TT film.


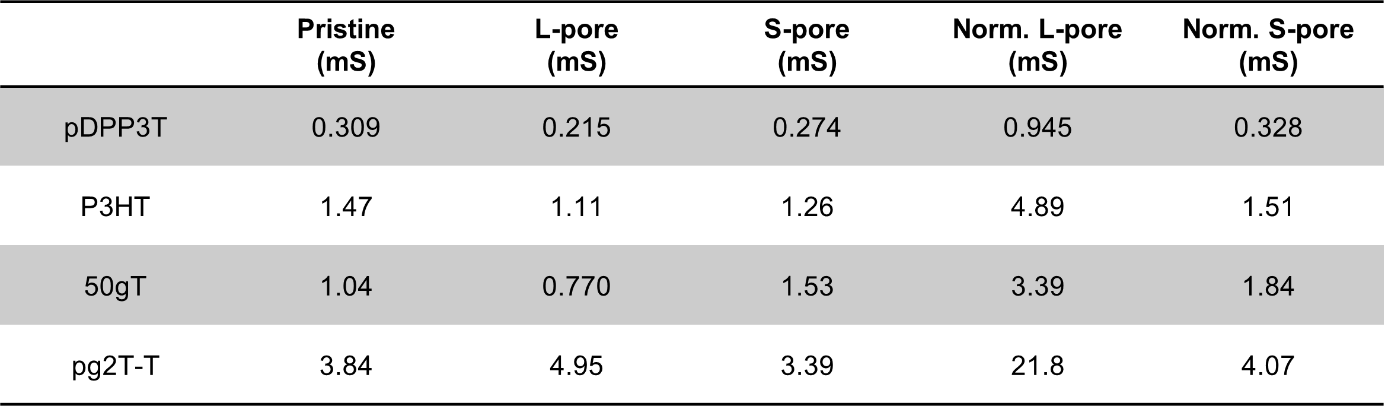


Table S1. Summary of the transconductance and normalized transconductance of pristine, L-pore, and S-pore devices employing pDPP3T, P3HT, 50gT, and pg2T-T. The normalized transconductance was calculated by dividing the original transconductance by the relative volume ratio, with the volume of the pristine film set to 1.


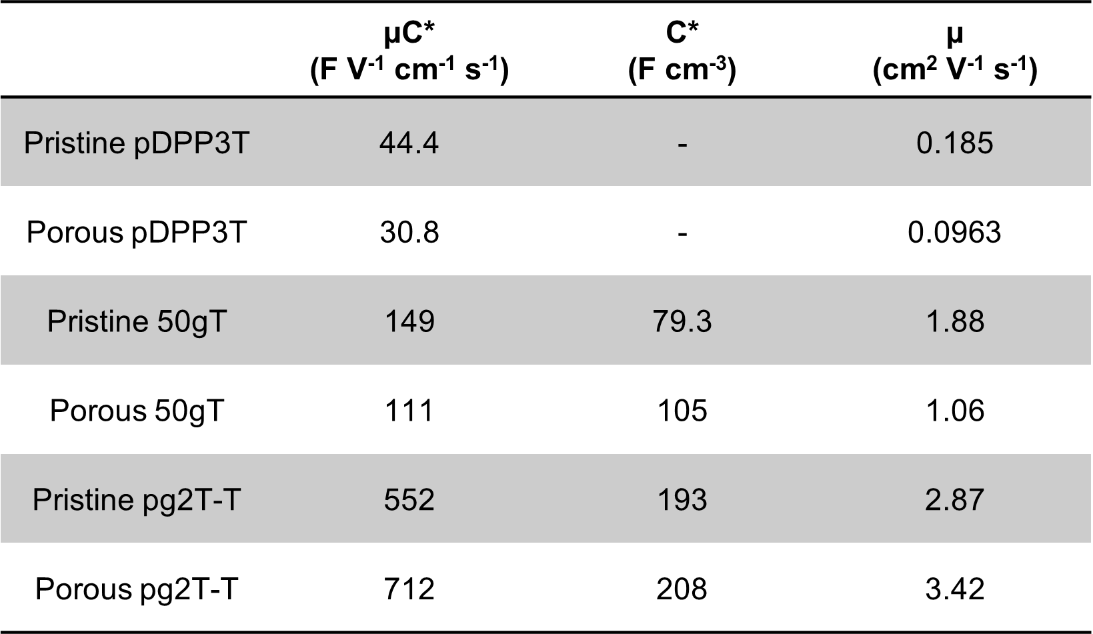


Table S2. Summary of the calculated µC*, C*, and µ values of pristine and porous pDPP3T, 50gT, and pg2T-T. The mobility of pDPP3T was extracted from the OFET transfer curve. C* was calculated using following equation.

C* =

where Acv is the area of the CV plot, Vmax and Vmin are the maximum and minimum voltages of CV scan, K is CV scan rate, and V is the volume of the polymer film.
